23 **Abstract**

24 Arthropod-borne viruses represent a significant public health threat worldwide yet there are few  
25 antiviral therapies or prophylaxis targeting these pathogens. In particular, the development of  
26 novel antivirals for high-risk populations such as pregnant women is essential to prevent  
27 devastating disease such as that which was experienced with the recent outbreak of Zika virus  
28 (ZIKV) in the Americas. One potential avenue to identify new and pregnancy friendly antiviral  
29 compounds is to repurpose well-known and widely used FDA approved drugs. In this study, we  
30 addressed the antiviral role of atovaquone, a FDA Pregnancy Category C drug and pyrimidine  
31 biosynthesis inhibitor used for the prevention and treatment of parasitic infections. We found that  
32 atovaquone was able to inhibit ZIKV and chikungunya virus virion production in human cells and  
33 that this antiviral effect occurred early during infection at the initial steps of viral RNA replication.  
34 Moreover, we were able to complement viral replication and virion production with the addition of  
35 exogenous pyrimidine nucleosides indicating that atovaquone is functioning through the inhibition  
36 of the pyrimidine biosynthesis pathway to inhibit viral replication. Finally, using an *ex vivo* human  
37 placental tissue model, we found that atovaquone could limit ZIKV infection in a dose-dependent  
38 manner providing evidence that atovaquone may function as an antiviral in humans. Taken  
39 together, these studies suggest that atovaquone could be a broad-spectrum antiviral drug and a  
40 potential attractive candidate for the prophylaxis or treatment of arbovirus infection in vulnerable  
41 populations, such as pregnant women.

42

43

44

45

46

47 **Author Summary**

48 The ability to protect vulnerable populations such as pregnant women and children from Zika virus  
49 and other arbovirus infections is essential to preventing the devastating complications induced by  
50 these viruses. One class of antiviral therapies may lie in known pregnancy-friendly drugs that  
51 have the potential to mitigate arbovirus infections and disease yet this has not been explored in  
52 detail. In this study, we show that the common antiparasitic drug, atovaquone, inhibits arbovirus  
53 replication through intracellular nucleotide depletion and can impair ZIKV infection in an *ex vivo*  
54 human placental explant model. Our study provides a novel function for atovaquone and  
55 highlights that the rediscovery of pregnancy-acceptable drugs with potential antiviral effects can  
56 be the key to better addressing the immediate need for treating viral infections and preventing  
57 potential birth complications and future disease.

58

59

60

61

62

63

64

65

66

67

68

## 69 Introduction

70 Recent outbreaks of significant human vector-borne pathogens have left us with the  
71 uncertainty of potential future devastating epidemics [1], [2]. In particular, Zika virus (ZIKV), a  
72 flavivirus and close relative of dengue virus (DENV), has led to an overwhelming spectrum of  
73 diseases, including Guillain-Barré syndrome, microcephaly, ocular and testicular damage, and  
74 even meningitis, encephalitis, thrombocytopenia and multiorgan failure [3], [4], [5], [6], [7], [8].  
75 This, coupled with the widespread and invasive *Aedes* species of mosquito makes it easy to  
76 envision another epidemic when environmental, ecological, and human factors meet [9].  
77 Unfortunately, there are no antiviral treatments or prophylaxes targeting these viruses, and thus  
78 efforts to mitigate and ultimately prevent the impact of the disease are urgent and need to be  
79 addressed.

80 Pregnant women carry a particularly high risk for ZIKV and other arbovirus-related  
81 complications [10], [11], [12]. Importantly, the capacity of the virus to infect trophoblasts, Hofbauer  
82 macrophages and endothelial cells [1], [13], thus allowing it to infect the fetus at any stage of  
83 growth, challenges the protective function of the placenta in the materno-fetal interface [14],[15].  
84 Despite the significant morbidity observed in newborns [16], there are no antivirals available to  
85 treat this population in part due to safety concerns during pregnancy, lack of biosafety studies  
86 and nonexistent clinical trials. With this in mind, and given the urgency of this need, we propose  
87 to repurpose existing drugs with an acceptable profile in pregnancy.

88 Nucleotide biosynthesis inhibitors such as ribavirin, brequinar, and mycophenolic acid (MPA)  
89 have been shown extensively to inhibit a wide array of viral infections both *in vitro* and *in vivo* [17],  
90 [18], [19], [20], [21] [22], [23]. In addition, a number of small compounds that possess antiviral  
91 function through the depletion of intracellular nucleotide pools have been identified, suggesting  
92 that this cellular pathway may be a prime target for antiviral development [24], [25], [26], [27], [28].  
93 Unfortunately, many of these compounds have numerous side effects and are not approved for

94 use in high risk populations such as pregnant women or children, thus the development of safe  
95 and pregnancy-acceptable nucleotide biosynthesis inhibitors would be ideal candidates as  
96 antivirals.

97 In these studies, we address the antiviral role of atovaquone, a FDA Pregnancy Category C  
98 and well-known antimalarial and antiparasitic drug that has been used repeatedly in the clinical  
99 setting for nearly two decades [29] [30], [31], [32]. Atovaquone is a ubiquinone (Coenzyme Q)  
100 analogue that functions through the inhibition of the mitochondrial cytochrome complex III [33,  
101 34]. However, it has also been shown to inhibit dihydroorotate dehydrogenase (DHODH), an  
102 enzyme required for *de novo* pyrimidine synthesis, leading to specific depletion of intracellular  
103 nucleotide pools [33], [35], [36], [37]. Given these capacities, we hypothesized that atovaquone  
104 may function similarly to other known nucleotide biosynthesis inhibitors and may inhibit RNA virus  
105 replication.

106 Here, we show that atovaquone is able to inhibit ZIKV and chikungunya virus (CHIKV)  
107 replication and virion production in human cells, similar to what has been shown for other  
108 pyrimidine biosynthesis inhibitors. Moreover, we found this effect to occur early in infection, during  
109 the initial steps of viral RNA synthesis and that viral inhibition can be rescued with the addition of  
110 exogenous pyrimidines, indicating this drug is functioning through the blocking of DHODH and  
111 depletion of intracellular nucleotides. Finally, we show that atovaquone can inhibit ZIKV infection  
112 in an *ex vivo* human placental tissue model. Taken together, these studies identify atovaquone  
113 as a potential pregnancy acceptable antiviral compound. More importantly, they highlight the  
114 potential to repurpose available drugs in the hopes to one day translate these findings to novel  
115 and safe approaches, preventing arbovirus-related outcomes of vulnerable populations.

116

117

## 118 **Results**

119 **Atovaquone inhibits arbovirus replication *in vitro*.** Nucleotide biosynthesis inhibitors have  
120 been shown to have antiviral activity towards a wide range of RNA viruses both *in vitro* and *in vivo*  
121 [18], [21], [26], [38], [39], [40], suggesting that manipulating this pathway is a potential avenue for  
122 antiviral development. However, many of these compounds are not approved for use in high-risk  
123 populations such as pregnant women. Atovaquone is a well-tolerated antiparasitic [31] drug that  
124 has been used extensively for the treatment and prevention of *pneumocystis jirovecii* pneumonia  
125 (PCP), toxoplasmosis, babesiosis and malaria [29], [30], [32], [34], yet the antiviral role of  
126 atovaquone has not been addressed. To examine the antiviral activity of atovaquone, we  
127 pretreated Vero cells with increasing concentrations of atovaquone as well as ribavirin, MPA, and  
128 brequinar, known nucleotide biosynthesis inhibitors shown to have antiviral function (**Figure 1**).  
129 The cells were subsequently infected with either the Ugandan or Brazilian strains of Zika virus  
130 (ZIKV) and viral inhibition was assessed 72 hours post infection by immunostaining for the ZIKV  
131 envelope (E) protein. We found that all known nucleotide biosynthesis inhibitors were able to  
132 inhibit ZIKV replication although in a strain specific manner (**Figure 1A-C**). Importantly, we found  
133 that atovaquone exhibited similar antiviral activity over the concentrations tested and that this  
134 inhibition was again strain specific (**Figure 1D-F**). Taken together, these studies show that  
135 atovaquone inhibits ZIKV infection and spread, potentially through the depletion of intracellular  
136 nucleotide pools.

137 **Atovaquone impairs ZIKV virion production in human cells.** Given the inhibition of viral  
138 replication in Vero cells, we next addressed whether atovaquone was able to reduce the  
139 production of infectious ZIKV particles in mammalian cell types including human cells. For these  
140 and all subsequent studies, we chose to use the Ugandan strain of ZIKV due to its robust  
141 replication *in vitro* and its relative resistance to atovaquone compared to the Brazilian strain  
142 (**Figure 1**). We infected Vero, human 293T and human placental JEG3 cells with the Ugandan

143 strain of ZIKV in the presence of atovaquone or a DMSO control and quantified infectious virion  
144 production by plaque assay. We found that atovaquone significantly impaired virion production in  
145 all cell types tested although the peak of inhibition varied between cell type (**Figure 2A-C**).

146 One potential explanation for these results could be that atovaquone is toxic, and this  
147 leads to reduced virus production. To address this, we first measured cell viability by a MTT cell  
148 proliferation assay and found that atovaquone indeed had a dose-dependent reduction in cell  
149 proliferation compared to the DMSO control (**Figure S1A**). However, atovaquone is a  
150 mitochondrial cytochrome complex III inhibitor [33, 36, 44] and thus we hypothesized that the MTT  
151 assay results we observed may be due to mitochondrial inhibition and are not directly indicative  
152 of dying cells. To confirm this, we measured cell viability with Sytox Green, a dye that binds nucleic  
153 acids when both the plasma and the nuclear membrane are permeabilized and thus represents  
154 dying cells (**Figure S1B**). Using this assay, we found that high concentrations of atovaquone,  
155 particularly in 293T cells, did lead to more cell death than the DMSO control; however, lower  
156 concentration, that did show effects by the MTT assay, had minimal effects on cell viability.  
157 Moreover, these results were confirmed in our data as although we observed a reduction in cell  
158 growth by MTT assay we found that in Vero and 293T cells, virus production increased at higher  
159 concentrations of atovaquone suggesting that the cells are still competent for virus production  
160 under these conditions. Taken together, these results show that atovaquone is able to inhibit ZIKV  
161 virion production in mammalian and human cell types.

162 To expand on these findings, we addressed if atovaquone could inhibit chikungunya virus  
163 (CHIKV), an arbovirus transmitted by *Aedes* mosquitoes and capable of causing severe human  
164 disease and significant outbreaks [45], [46], [47]. Importantly, CHIKV has been shown to be  
165 inhibited by nucleotide biosynthesis inhibitors [22], [48], [49], and thus we hypothesized it would  
166 be inhibited by atovaquone. We infected Vero cells with a CHIKV expressing a ZsGreen reporter  
167 in the presence of increasing concentrations of atovaquone and quantified the number of ZsGreen

168 positive cells after treatment by microscopy. Similar to ZIKV, CHIKV replication was inhibited by  
169 atovaquone in a dose-dependent manner (**Figure 3A**). This inhibition in replication was further  
170 confirmed in Vero and 293T cells where we observed reductions in infectious CHIKV virions after  
171 treatment with atovaquone (**Figure 3B**). These results suggest that atovaquone can inhibit  
172 multiple arboviruses and has the potential to be used as a well-tolerated antiviral therapy.

173 **Atovaquone inhibits ZIKV at early stages of infection.** To explore which stage of viral life cycle  
174 atovaquone targets, we first addressed viral entry by treating cells with atovaquone or DMSO  
175 during virus entry, washing the cells extensively, and adding back complete media (**Figure 4A**, at  
176 entry). As a control, we added atovaquone during entry and added back media containing  
177 atovaquone after infection (**Figure 4A**, post entry). We found that when cells are treated during  
178 viral entry there is no change in production of viral particles compared to DMSO yet when added  
179 after entry atovaquone was able to inhibit ZIKV replication suggesting that atovaquone functions  
180 post entry. To investigate this further, we performed time-of-addition experiments to test which  
181 part of the intracellular viral life cycle is targeted by atovaquone. We infected 293T cells with ZIKV,  
182 added atovaquone or a DMSO control at different time-points during infection (**Figure 4B**) and  
183 quantified viral titers by plaque assay at 36 hours post-infection. We found that ZIKV virion  
184 production is most inhibited at early stages of infection (up to 4 hours post infection) and that this  
185 effect diminishes as the infection progresses, suggesting that atovaquone acts early during  
186 infection, potentially inhibiting RNA replication. Finally, to investigate the impact of atovaquone on  
187 ZIKV RNA replication, we analyzed ZIKV intracellular RNA at multiple time points post infection  
188 (**Figure 4C**). We found that where viral RNA levels were equal after infection (time 0), again  
189 confirming there is no effect of atovaquone on viral entry, there was a significant difference in viral  
190 RNA at 24 and 48 hours post infection indicating that atovaquone is acting to inhibit ZIKV RNA  
191 replication early during infection.



192 **ZIKV RNA replication and virion production is rescued by the addition of exogenous**  
193 **nucleosides.** Given the role of atovaquone in the inhibition of DHODH and similar viral inhibition  
194 curves to brequinar, another inhibitor of DHODH and pyrimidine biosynthesis (**Figure 1B**), we  
195 hypothesized that atovaquone may function through a similar pathway. To address this, we  
196 performed a rescue experiment where we infected cells with ZIKV in the presence of atovaquone  
197 or DMSO followed by media with atovaquone supplemented with 100  $\mu$ M uridine, cytidine,  
198 adenosine, or guanosine. We found that in all cells types, ZIKV infectious particle production was  
199 rescued only when uridine was added to the media (**Figure 5A-C**). Given these results and the  
200 dual function of atovaquone in blocking both mitochondrial function and DHODH, it is possible  
201 that the addition of exogenous nucleosides could simply have rescued the MTT phenotype  
202 (mitochondrial function) we see for atovaquone and thus ZIKV replication. However, we found  
203 that when cells were incubated in the presence of atovaquone and nucleoside there was no  
204 change in MTT cell proliferation (**Figure S2**), indicating that the ZIKV inhibition and rescue we  
205 observe is not through mitochondrial inhibition but rather through the inhibition of DHODH.  
206 Furthermore, we addressed the ability of uridine to complement ZIKV RNA synthesis and found  
207 that indeed the addition of exogenous uridine rescued this phenotype to similar levels of the  
208 DMSO control (**Figure 5D**). Taken together, these results suggest that atovaquone is functioning  
209 through the depletion of intracellular nucleotide pools, and the addition of exogenous uridine can  
210 rescue ZIKV replication via the pyrimidine salvage pathway, bypassing the inhibition of  
211 atovaquone at critical steps in the *de novo* pyrimidine synthesis inhibition.

212 **Atovaquone inhibits ZIKV infection in an ex vivo human placental tissue model.** We found  
213 that atovaquone significantly inhibited ZIKV in human placental JEG3 cells *in vitro* and thus were  
214 interested in determining the extent to which this compound could inhibit ZIKV infection in an *ex*  
215 *vivo* human placental tissue model. To investigate this, we infected human placental chorionic  
216 villus explants with the Ugandan strain of ZIKV in the presence of increasing doses of atovaquone.

217 Similar to data in cell lines, we found that ZIKV infection and virion production were inhibited in a  
218 dose-dependent manner in the human placental tissue (**Figure 6A**). These results were confirmed  
219 by fluorescence *in situ* hybridization probing for ZIKV RNA in ZIKV infected tissue where  
220 atovaquone treatment reduced ZIKV spread (**Figure 6B**), showing a dose-dependent decrease  
221 in ZIKV-infected cells in the presence of increasing amounts of atovaquone. These data highlight  
222 that atovaquone may provide protection in the human placenta-fetal interface during ZIKV  
223 infection.

## 224 **Discussion**

225 It remains unknown when the next outbreak of ZIKV will occur, yet we know through past  
226 devastating epidemics, in which thousands of women and children were affected by this virus that  
227 we still have an urgent need for effective therapies against ZIKV infection [11], [50], [51]. Despite  
228 current potential protection from herd and self-immunity, environmental factors, and host-vector-  
229 virus interactions that keep ZIKV in the low incidence figures [1], [52], [53], [54], [55], preventing  
230 ZIKV and other arbovirus infections should be a priority. In recent years, many compounds have  
231 been proposed as potential anti-ZIKV agents following *in vitro* results [24], [25], [56], [57], [58],  
232 [59], [60], [61], [62], [63], [64], [65]. Some of these drugs have an extensive background in the  
233 medical field and offer attractive options, either alone or in combination, for treatment and perhaps  
234 prophylaxis of ZIKV infections; however, most of them remain inadequate to be used during  
235 pregnancy. Only chloroquine has been demonstrated in pregnancy animal models to be effective  
236 against ZIKV [56] [57] and none of them have been tested in humans in the context of ZIKV  
237 infection. Here, we propose a pregnancy-acceptable drug candidate for the treatment of ZIKV and  
238 other potential viral infections, highlighting the repurposing of FDA approved drugs as a possible  
239 avenue for antiviral development.

240 Atovaquone, a ubiquinone analogue approved in humans since 1999 for the treatment of  
241 *Pneumocystis jiroveci* pneumonia (PCP) [32], [34] and prevention of malaria [29], has no antiviral

242 activity described in the literature to date. However, given that atovaquone functions through the  
243 inhibition of pyrimidine biosynthesis, a pathway essential to viruses and the target of numerous  
244 antiviral compounds, we hypothesized that atovaquone may be antiviral as well. In this work, we  
245 addressed the antiviral role of atovaquone on ZIKV infections *in vitro* and in an *ex vivo* human  
246 placental tissue model, as well as explored the antiviral effect on CHIKV *in vitro*. We first screened  
247 atovaquone and the known nucleotide biosynthesis inhibitors and antiviral compounds, ribavirin,  
248 MPA, and brequinar, for their ability to inhibit two genetically distant strains of ZIKV. We found  
249 that ribavirin, MPA, and brequinar were able to inhibit ZIKV replication as has been shown  
250 previously and that atovaquone also led to inhibition of ZIKV replication behaving similarly to the  
251 pyrimidine biosynthesis inhibitor brequinar. Interestingly, we found that there was a strain-specific  
252 impact of the nucleotide biosynthesis inhibitors suggesting that genetic differences between the  
253 Ugandan and Brazilian strains may be responsible for the sensitivity to nucleotide depletion.  
254 Nonetheless, we concluded that atovaquone inhibits ZIKV replication similarly to other nucleotide  
255 biosynthesis inhibitors in Vero cells.

256         One potential caveat of these experiments could be that whereas we do detect reductions  
257 in ZIKV infected cells by immunofluorescence, this could have little impact on infectious virion  
258 production. To address this, we quantified infectious virus in the supernatant in the presence of  
259 atovaquone treatment compared to a DMSO control. As we saw with immunofluorescence,  
260 atovaquone was able to significantly reduce the amount of infectious virus in multiple mammalian  
261 cell types, including human placental cells over a subset of drug concentrations. Interestingly we  
262 found that in Vero and 293T cells, higher concentrations of drug had the least impact on virion  
263 production. One explanation for this could be that the virus has evolved to be resistant to  
264 atovaquone. However, we find this unlikely given the short time of infection and that drug  
265 resistance typically takes multiple passages. An additional explanation could be that at high  
266 concentrations, atovaquone is interfering with other cellular pathways that impede its antiviral

267 effects yet still results in the inhibition of mitochondrial function *in vitro*. This may be of particular  
268 importance for the use of atovaquone as an antiviral in humans. In the *in vitro* human cell culture  
269 system, the CC<sub>50</sub> of atovaquone was roughly 10 μM which contrasts with historical trials of  
270 atovaquone taken orally at a doses of 750 mg every 6 hours for the treatment of toxoplasmosis,  
271 reporting steady serum concentrations in humans of roughly 50 μM without associated toxicity  
272 [36] [66] [67]. One possible explanation for this difference is that *in vitro* studies do not entirely  
273 represent all the biological interactions that take place in the human body. In addition, it is possible  
274 that at this high concentration, atovaquone is not antiviral and thus would need to be optimized at  
275 lower concentrations for its antiviral function in humans.

276 To address the stage in the viral life cycle where atovaquone acts, we performed viral  
277 entry assays by infecting cells in the presence or absence of atovaquone and then adding media  
278 with or without the compound after infection. Here, we found that adding atovaquone at the time  
279 of infection had no effect on virion production whereas adding atovaquone after infection was able  
280 to reduce ZIKV replication, indicating that atovaquone is acting post entry. We then performed  
281 time-of-addition assays where we added atovaquone one hour before, during, and at multiple time  
282 points post infection. We found that only early during infection, within the first two to four hours  
283 post infection, was atovaquone able to inhibit viral replication. These data are similar to what has  
284 been seen for the antiviral effects of brequinar on DENV [20], [41], suggesting atovaquone may  
285 function by a similar mechanism. Given these results, we hypothesized that atovaquone is  
286 functioning during the initial steps of ZIKV RNA replication and blocking virion production through  
287 the inhibition of RNA replication. When we quantified ZIKV RNA levels over time we found that  
288 indeed atovaquone treatment significantly reduced viral RNA synthesis.

289 Atovaquone is thought to function primarily through the inhibition of mitochondrial  
290 cytochrome complex III and thus inhibition of mitochondrial function in the parasite [34], [36], [37].  
291 Using an MTT assay of cell proliferation measured through mitochondrial function we also saw

292 that atovaquone was able to reduce mitochondrial function in all cell lines we analyzed, yet these  
293 cells were shown to be viable by Sytox Green staining. Atovaquone also functions through  
294 inhibiting dihydroorotate dehydrogenase (DHODH) [33], an enzyme involved in pyrimidine  
295 biosynthesis and in particular the synthesis of uridine monophosphate (UMP). Given the striking  
296 similarities to brequinar, another pyrimidine biosynthesis inhibitor, and that atovaquone  
297 specifically inhibited ZIKV RNA synthesis we hypothesized that this inhibition was through  
298 intracellular nucleotide depletion. To address this, we added exogenous nucleosides in the  
299 presence of atovaquone and indeed found that the addition of uridine was able to rescue ZIKV  
300 infection in all cell types, although to various extents. Moreover, we found that the addition of  
301 uridine was able to specifically rescue ZIKV RNA synthesis indicating that the antiviral effects of  
302 the drugs are through the depletion of intracellular nucleotides. We found it interesting that human  
303 293T and JEG3 cells were unable to be completely rescued with the addition of uridine. However,  
304 it has been shown that nucleotide depletion will induce an antiviral innate immune response [26],  
305 [27], [40], and we hypothesize that a similar mechanism may be induced in these cells allowing  
306 them to retain antiviral function in the presence of exogenous uridine. One striking finding was  
307 that atovaquone in the presence of cytidine had an additive antiviral effect in several cell lines  
308 suggesting again that multiple cellular pathways may be at play. Finally, we show that atovaquone  
309 also works to inhibit ZIKV infection in human first and second trimester placental explants. Many  
310 studies have shown that placental cytotrophoblasts, trophoblasts, syncytiotrophoblasts, Hofbauer  
311 cells, and fibroblasts are susceptible to ZIKV [13], [15], [68], [69], [70], [71], [72]; thus recreating  
312 the dynamics of this infection and host-virus interaction at the placental level makes this study  
313 relevant to the most vulnerable target of ZIKV, pregnant women.

314 Taken together, we found that atovaquone, a pregnancy-acceptable and common  
315 antiparasitic drug, has antiviral activity against ZIKV and CHIKV which can be translated in the  
316 clinical setting into an attractive candidate for the treatment and prevention of arbovirus infections

317 in vulnerable populations as well as in individuals who live in or travel to endemic areas.  
318 Furthermore, patients with AIDS, chronic steroid users, and post-transplant patients that take  
319 atovaquone daily for the prevention of PCP, remain at high risk of acquiring multiple viral infections  
320 due to their impaired immune system. Therefore, it could be valuable to estimate the effect of  
321 atovaquone in viruses relevant to these patients such as human cytomegalovirus [73], herpes  
322 simplex virus [74], JC virus [75], and respiratory syncytial virus [76]. Atovaquone (in combination  
323 with proguanil hydrochloride) is already commercially available and broadly prescribed for malaria  
324 prophylaxis, yet so far there have not been proposed any clinical trials that address the  
325 relationship of atovaquone and ZIKV or CHIKV infections. This raises several questions: *i*) Are  
326 individuals who are/were taking atovaquone-proguanil (Malarone®) protected from viral threats  
327 as well? and *ii*) Does the broad administration of drugs which may unknowingly possess antiviral  
328 functions impact the evolution of viral infections? Future studies addressing these questions will  
329 be essential to understanding the antiviral function of atovaquone on viral evolution and disease.  
330 Nonetheless, these results contribute to the urgent need of finding effective ZIKV treatments  
331 especially for pregnant women, as these treatments should be readily accessible in order to  
332 ameliorate the teratogenic consequences of ZIKV across all trimesters of pregnancy. The studies  
333 completed here identified a potential candidate for these at-risk populations, yet more work is  
334 needed to define the complete antiviral role of atovaquone *in vivo*. Moreover, these studies have  
335 highlighted that repurposing drugs may provide fast avenues to the development of novel antiviral  
336 therapies and that we can potentially exploit FDA approved, pregnancy-friendly drugs to fight  
337 emerging viral threats.

338

339

340

341 **Materials and Methods**

342 **Cells and viruses.** Vero cells (CCL-81, ATCC) were cultured in Dulbecco Modified Eagle Medium  
343 (DMEM) (Corning) supplemented with 10% new born calf serum (NBCS, Gibco), 100 µg/mL  
344 penicillin-streptomycin (P/S) (Corning) at 37°C with 5% CO<sub>2</sub>. BHK-21 (CCL-10, ATCC), 293T  
345 (CRL-3216, ATCC), and JEG3 (provided by Dr. Carolyn Coyne, University of Pittsburgh) were  
346 cultured in DMEM supplemented with 10% fetal bovine serum (FBS, Atlanta Biologicals), 1%  
347 nonessential amino acids (NEAA, Corning), and 1% P/S at 37°C with 5% CO<sub>2</sub>. All cell lines were  
348 confirmed to be mycoplasma free.

349 The Ugandan (MR766) [77] and Brazilian (Paraiba\_01/2015) [78] strains of ZIKV were generated  
350 from [79] infectious clones provided by Dr. Matthew Evans (Icahn School of Medicine at Mount  
351 Sinai) and Dr. Alexander Pletnev (National Institutes of Health), respectively. To generate initial  
352 viral stocks, each plasmid was transfected via lipofectamine 2000 reagent (Invitrogen) into 293T  
353 cells and virus containing supernatant was harvested 48 hours post transfection. A working viral  
354 stock was then generated by passaging the initial viral stock over Vero cells. Viral titers were  
355 quantified by plaque assay. In brief, 10-fold serial dilutions of each virus in DMEM were added to  
356 a confluent monolayer of Vero cells for 1 hour at 37°C. Following incubation, cells were overlaid  
357 with 0.8% agarose in DMEM and 2% NBCS and incubated at 37°C for five days. The cells were  
358 fixed with 4% formalin, agarose plugs were removed, and plaques were visualized by crystal  
359 violet.

360 Wild type CHIKV was generated from the La Reunion 06-049 infectious clone as previously  
361 described [79] [48]. A CHIKV La Reunion infectious clone expressing ZsGreen was constructed  
362 by standard molecular biology techniques. First, an AvrII restriction enzyme site was inserted 5'  
363 of the subgenomic promoter by site-directed mutagenesis using the primers (Forward 5'  
364 CACTAATCAGCTACACCTAGGATGGAGTTCATCCC 3' and Reverse 5'  
365 GGGATGAACTCCATCCTAGGTGTAGCTGATTAGTG 3'). The CHIKV subgenomic promoter

366 was then amplified by PCR (Forward 5' CCTAGGCCATGGCCACCTTTGCAAG 3' and Reverse  
367 5' ACTAGTTGTAGCTGATTAGTGTTTAG 3') and subcloned into the AvrII site to generate a  
368 CHIKV infectious clone containing two subgenomic promoters. Finally, the ZsGreen cassette was  
369 amplified by PCR (Forward 5' GTGTACCTAGGATGGCCCAGTCCAAGCAC 3' and Reverse 5'  
370 GCTATCCTAGGTTAACTAGTGGGCAAGGC 3') from a CHIKV infectious clone obtained from  
371 Dr. Andres Merits (University of Tartu) and subcloned into the AvrII restriction enzyme site. The  
372 complete cassette and subgenomic regions were sequenced to ensure there were no second-  
373 site mutations. To generate infectious virus, each plasmid was linearized overnight with NotI,  
374 phenol-chloroform extracted, ethanol precipitated, and used for *in vitro* transcription using the SP6  
375 mMessage mMachine kit (Ambion). *In vitro* transcribed RNAs were phenol-chloroform extracted,  
376 ethanol precipitated, aliquoted at 1  $\mu\text{g}/\mu\text{l}$ , and stored at  $-80^{\circ}\text{C}$ . 10  $\mu\text{g}$  of each RNA was  
377 electroporated into BHK-21 cells [23] and virus was harvested 48 hours post electroporation.  
378 Working virus stocks were generated by passaging virus over BHK-21 cells and viral titers were  
379 quantified by plaque assay as described above.

380 **Ethics Statement.** For these experimental studies, first and second trimester human placental  
381 tissue was obtained within two hours of surgery from donors undergoing elective termination  
382 under an IRB protocol approved by the Institutional Review Board for the Ichan School of Medicine  
383 at Mt. Sinai (HS: 12-00145). All subjects provided informed written surgical consent for the use of  
384 de-identified waste materials for educational research. Tissue specimens are considered to be  
385 non-human subjects since they are de-identified. Following the surgery, tissue specimens are  
386 delivered to Mount Sinai's Institutional Biorepository and Molecular Pathology Shared Resource  
387 Facility (SRF) in the Department of Pathology. The biorepository operates under a Mount Sinai  
388 Institutional Review Board (IRB) approved protocol and follows guidelines set by HIPAA. All  
389 samples are linked, with appropriate IRB approval and consent, to clinical and pathological data,



390 and are open to all investigators of the institution, as well as to specific third-party collaborative  
391 efforts with investigators from other institutions.

392 **Ex vivo infection of human placental tissue.** First and second trimester human placental tissue  
393 was obtained as described above. Chorionic villi adjacent to the fetal chorionic plate were placed  
394 into prewarmed DMEM containing 25% F-12 media, 10% FBS, 5 mM HEPES, 2 mM Glutamine,  
395 100 IU/ml Penicillin, 100 µg/ml Streptomycin, 2.5 µg/ml Fungizone, and 300 ng/ml Timentin as  
396 previously described [80]. After removal of the amnion and decidua, the chorionic villi were cut  
397 into 0.2 cm<sup>3</sup> blocks; nine blocks were plated per well of a six-well plate onto collagen gelfoams  
398 (Cardinal Health) in 3 ml media, and 3 wells were used per condition (27 tissue blocks). Following  
399 an overnight incubation at 37°C, tissue blocks were individually infected with 1x10<sup>5</sup> PFU ZIKV<sup>MR766</sup>  
400 in a volume of 5 µl that was pre-incubated with 15 µM, 5 µM, or 1.6 µM atovaquone for 1 hour.  
401 Atovaquone was maintained in the culture media at the same concentrations throughout 6 days  
402 of culture. Supernatants were collected and media changed every other day.

403 **ZIKV plaque forming unit assay.** ZIKV plaque forming units (PFU) were quantified on Vero cell  
404 monolayers whereby 250 µl of tissue culture supernatant was adsorbed for 2 hours at 37°C in 12  
405 well plates, and cells were overlaid with 1.5 ml DMEM (Invitrogen) supplemented with 0.8%  
406 methyl cellulose, 2% FBS, and 50 µg/ml gentamicin sulfate. Cells were incubated for 5 days at  
407 37°C, fixed with 4% paraformaldehyde, and stained with crystal violet for plaque visualization.

408 **ZIKV RNA detection by *in situ* hybridization.** Placental tissues from day 6 post infection were  
409 fixed in 10% neutral buffered formalin for 24 hours and placed back into PBS until paraffin  
410 embedding. *In situ* hybridization using RNAscope® was performed on 5 µm paraffin-embedded  
411 sections. Deparaffinization and target retrieval were performed using RNAscope® Universal  
412 Pretreatment Reagents (ACD #322380) following the manufacturer's protocol, and fluorescence  
413 *in situ* hybridization was subsequently performed according to the manufacturer's protocol (ACD#  
414 323110) with RNAscope® Probe V-ZIKVsph2015 (ACD #467871) as previously described [56].

415 Following *in situ* hybridization, slides were mounted with Vectashield hard-set mounting medium  
416 with DAPI (Vector Laboratories) and analyzed using an AxioImager Z2 microscope (Zeiss) and  
417 Zen 2012 software (Zeiss).

418 **Drug sensitivity assays.** Vero cells (10,000 cells/well in a 96-well plate) were pretreated with  
419 media containing a carrier control or drug (ribavirin, mycophenolic acid, brequinar (Sigma) or  
420 atovaquone (ABCAM)) for 2 hours at 37°C. Following pre-incubation, cells were incubated with  
421 ZIKV or CHIKV-ZsGreen at a multiplicity of infection (MOI) of 0.1 in the presence of each drug or  
422 carrier control for 1 hour at 37°C. Cells were then washed extensively and media containing drug  
423 or carrier was added to each well. After incubation at 37°C for 48 h, cells were fixed with 4%  
424 paraformaldehyde and subject to immunostaining or visualized directly in the case of CHIKV-  
425 ZsGreen. In brief, following fixation the cells were washed with Perm-Wash buffer (BD  
426 Bioscience), permeabilized with 0.25% Triton-X 100 in phosphate buffered saline (PBS) (Gibco),  
427 and blocked with 0.2% bovine serum albumin (BSA) and 0.05% Saponin in PBS for 1 hour at  
428 room temperature (RT). Cells were then incubated with a monoclonal mouse antibody to the  
429 Flavivirus envelope protein (4G2) (Millipore) for 1 hr at RT. Following primary antibody incubation,  
430 cells were washed with Perm-Wash buffer and incubated with a secondary anti-mouse IgG  
431 antibody conjugated to Alexa488 for 1 hour at RT. DAPI staining protocol. Cells were then washed  
432 and infected cells were quantified on a CellInsight CX7 High-content microscope and screening  
433 platform using uninfected cells as a negative control and a cut-off for three standard deviations  
434 from negative to be scored as an infected cell.

435 To address the effect of atovaquone on infectious virion production, mammalian and insect cells  
436 were seeded as described above and infected with ZIKV at an MOI of 0.1 in the presence of  
437 increasing concentrations of atovaquone for 1 hr at 37°C. Cells were washed with PBS and  
438 incubated in media containing atovaquone or DMSO as a control for 36 hrs at 37°C. Virus  
439 containing supernatants were collected and viral titers were quantified by plaque assay.

440 **Cell viability assays.** Cell viability was measured using the CellTiter 96 non-radioactive cell  
441 proliferation assay (Promega), according to the manufacturer's protocol. Vero, 293T, and JEG3  
442 cells (10,000 cells/well in a 96-well plate) were treated with increasing concentrations of  
443 atovaquone and incubated for 36 hours at 37°C. Following the incubation, 15 µL of dye solution  
444 was added to each well and incubated for 4 hours at 37°C with 5% CO<sub>2</sub>. The reaction was stopped  
445 by the addition of 100 µL of Solubilization/Stop Solution and the absorbance was measured at  
446 570 nm in an EnVision microplate reader. The 50% cytotoxic concentration (CC<sub>50</sub>) was calculated  
447 by a non-linear regression analysis of the dose-response curves. Cell viability was also assayed  
448 using Sytox Green (Invitrogen) following the manufacturer's instructions. Sytox green positive  
449 cells were quantified on the CellInsight CX7 high-content microscope as described above.

450 **RNA extractions and RT-qPCR.** Intracellular viral RNA was extracted with TRIzol reagent  
451 (Invitrogen) following the manufacturer's instructions and used directly for cDNA synthesis with  
452 the Maxima H minus-strand kit (Thermo). Relative viral RNA levels were quantified using Power  
453 SYBR Green (Applied Biosystems) using the following primers [81]: GAPDH ((5'-  
454 GAAGGTCGGAGTCAACGGATTT -3' and 5'- GAATTTGCCATGGGTGGAAT -3') and ZIKV (5'-  
455 AGATGACTGCGTTGTGAAGC-3' and 5'- GAGCAGAACGGGACTTCTTC-3').

456 **Virus entry and time-of-addition assays.** To assay for the role of atovaquone in viral entry,  
457 293T cells were infected with ZIKV at an MOI of 0.1 in the presence of 4.5 µM atovaquone for 1  
458 hour at 37°C. Cells were washed extensively, complete media with or without 4.5 µM atovaquone  
459 was added back to the cells, and virus containing supernatants were collected 36 hours post  
460 infection. Viral titers were quantified by plaque assay. As a control, media containing atovaquone  
461 was added after infection.

462 For time-of-addition studies, 293T cells, pretreated with 4.5 µM atovaquone for 1 hour or left  
463 untreated, were infected with ZIKV at an MOI of 0.1 in the presence or absence of atovaquone

464 for 1h at 37°C. Following incubation, cells were washed to remove unabsorbed virus and media  
465 with or without atovaquone was added. At different time points post-infection, media was removed  
466 and media containing 4.5  $\mu$ M atovaquone was added to the infected cells. Culture medium was  
467 collected at 36 hours post infection and viral titers were quantified by plaque assay. Media  
468 containing DMSO was used as a control for all time points.

469 **Rescue assay.** Vero, 293T, JEG3, and C6/36 cells were seeded in a 96-well plate as described  
470 above. Cells were infected with ZIKV diluted to an MOI of 0.1 in DMEM containing atovaquone  
471 for 1h at 37°C. Following incubation, cells were washed three times with PBS to remove  
472 unabsorbed virus. After wash, cells were incubated with media containing atovaquone with either  
473 DMSO, or 100  $\mu$ M uridine, cytidine, adenosine, or guanosine for 36hrs. Culture medium was  
474 collected at 36 hours post infection and viral titers quantified by plaque assay.

475 **Data analysis and statistics.** GraphPad Prism 7.0 software was used for all analyses. The  
476 equations to fit the best curve were generated based on R<sup>2</sup> values  $\geq$  0.9 [inhibitory concentration  
477 vs normalized response]. Two-way ANOVA and Students *t*-tests were also used, with P values  
478  $<$ 0.05 considered statistically significant.

479

## 480 **ACKNOWLEDGMENTS**

481 We thank all members of the Stapleford lab for support and helpful discussions during the course  
482 of the study. We thank Aaron Briley and Meike Dittmann for technical assistance with the CX7  
483 CellInsight High content microscopy and helpful discussion. Finally, we thank the labs of Drs.  
484 Carolyn Coyne, Matthew Evans, and Alexander Pletnev for essential cells and reagents.

485

486

487 **References**

- 488 1. Pierson TC, Diamond MS. The emergence of Zika virus and its new clinical syndromes.  
489 Nature. 2018;560(7720):573-81.
- 490 2. Duffy MR, Chen TH, Hancock WT, Powers AM, Kool JL, Lanciotti RS, et al. Zika virus  
491 outbreak on Yap Island, Federated States of Micronesia. N Engl J Med. 2009;360(24):2536-43.
- 492 3. Swaminathan S, Schlaberg R, Lewis J, Hanson KE, Couturier MR. Fatal Zika Virus  
493 Infection with Secondary Nonsexual Transmission. N Engl J Med. 2016;375(19):1907-9.
- 494 4. Karimi O, Goorhuis A, Schinkel J, Codrington J, Vreden SGS, Vermaat JS, et al.  
495 Thrombocytopenia and subcutaneous bleedings in a patient with Zika virus infection. Lancet.  
496 2016;387(10022):939-40.
- 497 5. Pradhan F, Burns JD, Agameya A, Patel A, Alfaqih M, Small JE, et al. Case Report: Zika  
498 Virus Meningoencephalitis and Myelitis and Associated Magnetic Resonance Imaging Findings.  
499 Am J Trop Med Hyg. 2017;97(2):340-3.
- 500 6. Carteaux G, Maquart M, Bedet A, Contou D, Brugieres P, Fourati S, et al. Zika Virus  
501 Associated with Meningoencephalitis. N Engl J Med. 2016;374(16):1595-6.
- 502 7. de Oliveira Dias JR, Ventura CV, de Paula Freitas B, Prazeres J, Ventura LO, Bravo-Filho  
503 V, et al. Zika and the Eye: Pieces of a Puzzle. Prog Retin Eye Res. 2018;66:85-106.
- 504 8. Dirlikov E, Torres JV, Martines RB, Reagan-Steiner S, Perez GV, Rivera A, et al.  
505 Postmortem Findings in Patient with Guillain-Barre Syndrome and Zika Virus Infection. Emerg  
506 Infect Dis. 2018;24(1):114-7.
- 507 9. Kraemer MU, Sinka ME, Duda KA, Mylne AQ, Shearer FM, Barker CM, et al. The global  
508 distribution of the arbovirus vectors *Aedes aegypti* and *Ae. albopictus*. Elife. 2015;4:e08347.
- 509 10. Oliveira Melo AS, Malingier G, Ximenes R, Szejnfeld PO, Alves Sampaio S, Bispo de  
510 Filippis AM. Zika virus intrauterine infection causes fetal brain abnormality and microcephaly: tip  
511 of the iceberg? Ultrasound Obstet Gynecol. 2016;47(1):6-7.

- 512 11. Honein MA. Recognizing the Global Impact of Zika Virus Infection during Pregnancy. N  
513 Engl J Med. 2018;378(11):1055-6.
- 514 12. Marinho PS, Cunha AJ, Amim Junior J, Prata-Barbosa A. A review of selected Arboviruses  
515 during pregnancy. Matern Health Neonatol Perinatol. 2017;3:17.
- 516 13. de Noronha L, Zanluca C, Burger M, Suzukawa AA, Azevedo M, Rebutini PZ, et al. Zika  
517 Virus Infection at Different Pregnancy Stages: Anatomopathological Findings, Target Cells and  
518 Viral Persistence in Placental Tissues. Front Microbiol. 2018;9:2266.
- 519 14. Sheridan MA, Yunusov D, Balaraman V, Alexenko AP, Yabe S, Verjovski-Almeida S, et  
520 al. Vulnerability of primitive human placental trophoblast to Zika virus. Proc Natl Acad Sci U S A.  
521 2017;114(9):E1587-E96.
- 522 15. Quicke KM, Bowen JR, Johnson EL, McDonald CE, Ma H, O'Neal JT, et al. Zika Virus  
523 Infects Human Placental Macrophages. Cell Host Microbe. 2016;20(1):83-90.
- 524 16. Hussain A, Ali F, Latiwesh OB, Hussain S. A Comprehensive Review of the Manifestations  
525 and Pathogenesis of Zika Virus in Neonates and Adults. Cureus. 2018;10(9):e3290.
- 526 17. Hinton TM, Zuwala K, Deffrasnes C, Todd S, Shi S, Marsh GA, et al. Polyanionic  
527 Macromolecular Prodrugs of Ribavirin: Antiviral Agents with a Broad Spectrum of Activity. Adv  
528 Healthc Mater. 2016;5(5):534-40.
- 529 18. Snell NJ. Ribavirin--current status of a broad spectrum antiviral agent. Expert Opin  
530 Pharmacother. 2001;2(8):1317-24.
- 531 19. Kamiyama N, Soma R, Hidano S, Watanabe K, Umekita H, Fukuda C, et al. Ribavirin  
532 inhibits Zika virus (ZIKV) replication in vitro and suppresses viremia in ZIKV-infected STAT1-  
533 deficient mice. Antiviral Res. 2017;146:1-11.
- 534 20. Qing M, Zou G, Wang QY, Xu HY, Dong H, Yuan Z, et al. Characterization of dengue virus  
535 resistance to brequinar in cell culture. Antimicrob Agents Chemother. 2010;54(9):3686-95.
- 536 21. Goebel S, Snyder B, Sellati T, Saeed M, Ptak R, Murray M, et al. A sensitive virus yield  
537 assay for evaluation of Antivirals against Zika Virus. J Virol Methods. 2016;238:13-20.

- 538 22. Coffey LL, Beeharry Y, Borderia AV, Blanc H, Vignuzzi M. Arbovirus high fidelity variant  
539 loses fitness in mosquitoes and mice. *Proc Natl Acad Sci U S A*. 2011;108(38):16038-43.
- 540 23. Rozen-Gagnon K, Stapleford KA, Mongelli V, Blanc H, Failloux AB, Saleh MC, et al.  
541 Alphavirus mutator variants present host-specific defects and attenuation in mammalian and  
542 insect models. *PLoS Pathog*. 2014;10(1):e1003877.
- 543 24. da Silva S, Oliveira Silva Martins D, Jardim ACG. A Review of the Ongoing Research on  
544 Zika Virus Treatment. *Viruses*. 2018;10(5).
- 545 25. Saiz JC, Oya NJ, Blazquez AB, Escribano-Romero E, Martin-Acebes MA. Host-Directed  
546 Antivirals: A Realistic Alternative to Fight Zika Virus. *Viruses*. 2018;10(9).
- 547 26. Lucas-Hourani M, Dauzonne D, Jorda P, Cousin G, Lupan A, Helynck O, et al. Inhibition  
548 of pyrimidine biosynthesis pathway suppresses viral growth through innate immunity. *PLoS*  
549 *Pathog*. 2013;9(10):e1003678.
- 550 27. Luthra P, Naidoo J, Pietzsch CA, De S, Khadka S, Anantpadma M, et al. Inhibiting  
551 pyrimidine biosynthesis impairs Ebola virus replication through depletion of nucleoside pools and  
552 activation of innate immune responses. *Antiviral Res*. 2018;158:288-302.
- 553 28. Raveh A, Delekta PC, Dobry CJ, Peng W, Schultz PJ, Blakely PK, et al. Discovery of  
554 potent broad spectrum antivirals derived from marine actinobacteria. *PLoS One*.  
555 2013;8(12):e82318.
- 556 29. Ling J, Baird JK, Fryauff DJ, Sismadi P, Bangs MJ, Lacy M, et al. Randomized, placebo-  
557 controlled trial of atovaquone/proguanil for the prevention of *Plasmodium falciparum* or  
558 *Plasmodium vivax* malaria among migrants to Papua, Indonesia. *Clin Infect Dis*. 2002;35(7):825-  
559 33.
- 560 30. Krause PJ, Lepore T, Sikand VK, Gadbow J, Jr., Burke G, Telford SR, 3rd, et al.  
561 Atovaquone and azithromycin for the treatment of babesiosis. *N Engl J Med*. 2000;343(20):1454-  
562 8.

- 563 31. Tan KR, Fairley JK, Wang M, Gutman JR. A survey on outcomes of accidental  
564 atovaquone-proguanil exposure in pregnancy. *Malar J.* 2018;17(1):198.
- 565 32. Kovacs JA. Efficacy of atovaquone in treatment of toxoplasmosis in patients with AIDS.  
566 The NIAID-Clinical Center Intramural AIDS Program. *Lancet.* 1992;340(8820):637-8.
- 567 33. Ashton TM, Fokas E, Kunz-Schughart LA, Folkes LK, Anbalagan S, Huether M, et al. The  
568 anti-malarial atovaquone increases radiosensitivity by alleviating tumour hypoxia. *Nat Commun.*  
569 2016;7:12308.
- 570 34. Artymowicz RJ, James VE. Atovaquone: a new antipneumocystis agent. *Clin Pharm.*  
571 1993;12(8):563-70.
- 572 35. Yeo AE, Seymour KK, Rieckmann KH, Christopherson RI. Effects of dual combinations of  
573 antifolates with atovaquone or dapsone on nucleotide levels in *Plasmodium falciparum*. *Biochem*  
574 *Pharmacol.* 1997;53(7):943-50.
- 575 36. Baggish AL, Hill DR. Antiparasitic agent atovaquone. *Antimicrob Agents Chemother.*  
576 2002;46(5):1163-73.
- 577 37. Cushion MT, Collins M, Hazra B, Kaneshiro ES. Effects of atovaquone and diospyrin-  
578 based drugs on the cellular ATP of *Pneumocystis carinii* f. sp. *carinii*. *Antimicrob Agents*  
579 *Chemother.* 2000;44(3):713-9.
- 580 38. Adcock RS, Chu YK, Golden JE, Chung DH. Evaluation of anti-Zika virus activities of  
581 broad-spectrum antivirals and NIH clinical collection compounds using a cell-based, high-  
582 throughput screen assay. *Antiviral Res.* 2017;138:47-56.
- 583 39. Tong X, Smith J, Bukreyeva N, Koma T, Manning JT, Kalkeri R, et al. Merimepodib, an  
584 IMPDH inhibitor, suppresses replication of Zika virus and other emerging viral pathogens. *Antiviral*  
585 *Res.* 2018;149:34-40.
- 586 40. Chung DH, Golden JE, Adcock RS, Schroeder CE, Chu YK, Sotsky JB, et al. Discovery  
587 of a Broad-Spectrum Antiviral Compound That Inhibits Pyrimidine Biosynthesis and Establishes



- 588 a Type 1 Interferon-Independent Antiviral State. *Antimicrob Agents Chemother.* 2016;60(8):4552-  
589 62.
- 590 41. Yeo KL, Chen YL, Xu HY, Dong H, Wang QY, Yokokawa F, et al. Synergistic suppression  
591 of dengue virus replication using a combination of nucleoside analogs and nucleoside synthesis  
592 inhibitors. *Antimicrob Agents Chemother.* 2015;59(4):2086-93.
- 593 42. Bassi MR, Sempere RN, Meyn P, Polacek C, Arias A. Extinction of Zika Virus and Usutu  
594 Virus by Lethal Mutagenesis Reveals Different Patterns of Sensitivity to Three Mutagenic Drugs.  
595 *Antimicrob Agents Chemother.* 2018;62(9).
- 596 43. Kim JA, Seong RK, Kumar M, Shin OS. Favipiravir and Ribavirin Inhibit Replication of  
597 Asian and African Strains of Zika Virus in Different Cell Models. *Viruses.* 2018;10(2).
- 598 44. Siregar JE, Kurisu G, Kobayashi T, Matsuzaki M, Sakamoto K, Mi-ichi F, et al. Direct  
599 evidence for the atovaquone action on the Plasmodium cytochrome bc1 complex. *Parasitol Int.*  
600 2015;64(3):295-300.
- 601 45. Burt FJ, Chen W, Miner JJ, Lenschow DJ, Merits A, Schnettler E, et al. Chikungunya virus:  
602 an update on the biology and pathogenesis of this emerging pathogen. *Lancet Infect Dis.*  
603 2017;17(4):e107-e17.
- 604 46. Hua C, Combe B. Chikungunya Virus-Associated Disease. *Curr Rheumatol Rep.*  
605 2017;19(11):69. Epub 2017/10/07. doi: 10.1007/s11926-017-0694-0. PubMed PMID: 28983760.
- 606 47. Vanlandingham DL, Higgs S, Huang YJ. *Aedes albopictus* (Diptera: Culicidae) and  
607 Mosquito-Borne Viruses in the United States. *J Med Entomol.* 2016;53(5):1024-8.
- 608 48. Stapleford KA, Rozen-Gagnon K, Das PK, Saul S, Poirier EZ, Blanc H, et al. Viral  
609 Polymerase-Helicase Complexes Regulate Replication Fidelity To Overcome Intracellular  
610 Nucleotide Depletion. *J Virol.* 2015;89(22):11233-44.
- 611 49. Gallegos KM, Drusano GL, DZ DA, Brown AN. Chikungunya Virus: In Vitro Response to  
612 Combination Therapy With Ribavirin and Interferon Alfa 2a. *J Infect Dis.* 2016;214(8):1192-7.

- 613 50. Santos B, Coelho FC, Armstrong M, Saraceni V, Lemos C. Zika: an ongoing threat to  
614 women and infants. *Cad Saude Publica*. 2018;34(11):e00038218.
- 615 51. Fauci AS, Morens DM. Zika Virus in the Americas--Yet Another Arbovirus Threat. *N Engl*  
616 *J Med*. 2016;374(7):601-4.
- 617 52. Liu Y, Liu J, Du S, Shan C, Nie K, Zhang R, et al. Evolutionary enhancement of Zika virus  
618 infectivity in *Aedes aegypti* mosquitoes. *Nature*. 2017;545(7655):482-6.
- 619 53. O'Reilly KM, Lowe R, Edmunds WJ, Mayaud P, Kucharski A, Eggo RM, et al. Projecting  
620 the end of the Zika virus epidemic in Latin America: a modelling analysis. *BMC Med*.  
621 2018;16(1):180.
- 622 54. Rossi SL, Ebel GD, Shan C, Shi PY, Vasilakis N. Did Zika Virus Mutate to Cause Severe  
623 Outbreaks? *Trends Microbiol*. 2018;26(10):877-85.
- 624 55. Sasseti M, Ze-Ze L, Franco J, Cunha JD, Gomes A, Tome A, et al. First case of confirmed  
625 congenital Zika syndrome in continental Africa. *Trans R Soc Trop Med Hyg*. 2018;112(10):458-  
626 62.
- 627 56. Cao B, Parnell LA, Diamond MS, Mysorekar IU. Inhibition of autophagy limits vertical  
628 transmission of Zika virus in pregnant mice. *J Exp Med*. 2017;214(8):2303-13.
- 629 57. Shiryayev SA, Mesci P, Pinto A, Fernandes I, Sheets N, Shresta S, et al. Repurposing of  
630 the anti-malaria drug chloroquine for Zika Virus treatment and prophylaxis. *Sci Rep*.  
631 2017;7(1):15771.
- 632 58. Yang S, Xu M, Lee EM, Gorshkov K, Shiryayev SA, He S, et al. Emetine inhibits Zika and  
633 Ebola virus infections through two molecular mechanisms: inhibiting viral replication and  
634 decreasing viral entry. *Cell Discov*. 2018;4:31.
- 635 59. Retallack H, Di Lullo E, Arias C, Knopp KA, Laurie MT, Sandoval-Espinosa C, et al. Zika  
636 virus cell tropism in the developing human brain and inhibition by azithromycin. *Proc Natl Acad*  
637 *Sci U S A*. 2016;113(50):14408-13.

- 638 60. Sacramento CQ, de Melo GR, de Freitas CS, Rocha N, Hoelz LV, Miranda M, et al. The  
639 clinically approved antiviral drug sofosbuvir inhibits Zika virus replication. *Sci Rep.* 2017;7:40920.
- 640 61. Han Y, Mesplede T, Xu H, Quan Y, Wainberg MA. The antimalarial drug amodiaquine  
641 possesses anti-ZIKA virus activities. *J Med Virol.* 2018;90(5):796-802.
- 642 62. Cao RY, Xu YF, Zhang TH, Yang JJ, Yuan Y, Hao P, et al. Pediatric Drug Nitazoxanide:  
643 A Potential Choice for Control of Zika. *Open Forum Infect Dis.* 2017;4(1):ofx009.
- 644 63. Li Z, Brecher M, Deng YQ, Zhang J, Sakamuru S, Liu B, et al. Existing drugs as broad-  
645 spectrum and potent inhibitors for Zika virus by targeting NS2B-NS3 interaction. *Cell Res.*  
646 2017;27(8):1046-64.
- 647 64. Xu M, Lee EM, Wen Z, Cheng Y, Huang WK, Qian X, et al. Identification of small-molecule  
648 inhibitors of Zika virus infection and induced neural cell death via a drug repurposing screen. *Nat*  
649 *Med.* 2016;22(10):1101-7.
- 650 65. Chan JF, Chik KK, Yuan S, Yip CC, Zhu Z, Tee KM, et al. Novel antiviral activity and  
651 mechanism of bromocriptine as a Zika virus NS2B-NS3 protease inhibitor. *Antiviral Res.*  
652 2017;141:29-37.
- 653 66. Basco LK, Ramiliarisoa O, Le Bras J. In vitro activity of atovaquone against the African  
654 isolates and clones of *Plasmodium falciparum*. *Am J Trop Med Hyg.* 1995;53(4):388-91.
- 655 67. Shanks GD, Gordon DM, Klotz FW, Aleman GM, Oloo AJ, Sadie D, et al. Efficacy and  
656 safety of atovaquone/proguanil as suppressive prophylaxis for *Plasmodium falciparum* malaria.  
657 *Clin Infect Dis.* 1998;27(3):494-9.
- 658 68. Szaba FM, Tighe M, Kummer LW, Lanzer KG, Ward JM, Lanthier P, et al. Zika virus  
659 infection in immunocompetent pregnant mice causes fetal damage and placental pathology in the  
660 absence of fetal infection. *PLoS Pathog.* 2018;14(4):e1006994. E
- 661 69. Miner JJ, Cao B, Govero J, Smith AM, Fernandez E, Cabrera OH, et al. Zika Virus Infection  
662 during Pregnancy in Mice Causes Placental Damage and Fetal Demise. *Cell.* 2016;165(5):1081-  
663 91.

- 664 70. Ribeiro MR, Moreli JB, Marques RE, Papa MP, Meuren LM, Rahal P, et al. Zika-virus-  
665 infected human full-term placental explants display pro-inflammatory responses and undergo  
666 apoptosis. *Arch Virol*. 2018.
- 667 71. Vermillion MS, Lei J, Shabi Y, Baxter VK, Crilly NP, McLane M, et al. Intrauterine Zika  
668 virus infection of pregnant immunocompetent mice models transplacental transmission and  
669 adverse perinatal outcomes. *Nat Commun*. 2017;8:14575.
- 670 72. Tabata T, Pettitt M, Puerta-Guardo H, Michlmayr D, Wang C, Fang-Hoover J, et al. Zika  
671 Virus Targets Different Primary Human Placental Cells, Suggesting Two Routes for Vertical  
672 Transmission. *Cell Host Microbe*. 2016;20(2):155-66.
- 673 73. de la Camara R. CMV in Hematopoietic Stem Cell Transplantation. *Mediterr J Hematol*  
674 *Infect Dis*. 2016;8(1):e2016031.
- 675 74. Munawwar A, Singh S. Human Herpesviruses as Copathogens of HIV Infection, Their  
676 Role in HIV Transmission, and Disease Progression. *J Lab Physicians*. 2016;8(1):5-18.
- 677 75. Beltrami S, Gordon J. Immune surveillance and response to JC virus infection and PML.  
678 *J Neurovirol*. 2014;20(2):137-49.
- 679 76. Waghmare A, Campbell AP, Xie H, Seo S, Kuypers J, Leisenring W, et al. Respiratory  
680 syncytial virus lower respiratory disease in hematopoietic cell transplant recipients: viral RNA  
681 detection in blood, antiviral treatment, and clinical outcomes. *Clin Infect Dis*. 2013;57(12):1731-  
682 41.
- 683 77. Schwarz MC, Sourisseau M, Espino MM, Gray ES, Chambers MT, Tortorella D, et al.  
684 Rescue of the 1947 Zika Virus Prototype Strain with a Cytomegalovirus Promoter-Driven cDNA  
685 Clone. *mSphere*. 2016;1(5).
- 686 78. Tsetsarkin KA, Kenney H, Chen R, Liu G, Manukyan H, Whitehead SS, et al. A Full-Length  
687 Infectious cDNA Clone of Zika Virus from the 2015 Epidemic in Brazil as a Genetic Platform for  
688 Studies of Virus-Host Interactions and Vaccine Development. *MBio*. 2016;7(4).

689 79. Coffey LL, Vignuzzi M. Host alternation of chikungunya virus increases fitness while  
690 restricting population diversity and adaptability to novel selective pressures. *J Virol.*  
691 2011;85(2):1025-35.

692 80. Weisblum Y, Oiknine-Djian E, Vorontsov OM, Haimov-Kochman R, Zakay-Rones Z, Meir  
693 K, et al. Zika Virus Infects Early- and Midgestation Human Maternal Decidual Tissues, Inducing  
694 Distinct Innate Tissue Responses in the Maternal-Fetal Interface. *J Virol.* 2017;91(4).

695 81. Bayer A, Lennemann NJ, Ouyang Y, Bramley JC, Morosky S, Marques ET, Jr., et al. Type  
696 III Interferons Produced by Human Placental Trophoblasts Confer Protection against Zika Virus  
697 Infection. *Cell Host Microbe.* 2016;19(5):705-12.

698

699

700

701

702

703

704

705

706

707

708

709

710

711 **Figure Legends**

712 **Figure 1: Nucleotide biosynthesis inhibitors impair ZIKV replication.**

713 Vero cells were pretreated with (A) ribavirin, (B) brequinar, (C) mycophenolic acid, (D)  
714 atovaquone or carrier controls for two hours and subsequently infected with either the Ugandan  
715 (MR766) or Brazilian (Paraiba\_01/2015) strain of ZIKV at a MOI of 0.1. Cells were fixed 72 hours  
716 post infection, stained with anti-flavivirus E antibody, and infected cells were quantified on a  
717 CellInsight CX7 high-content microscope. Data are represented as percent ZIKV positive cells  
718 compared to the carrier control. (E and F) Representative images of Ugandan (E) and Brazilian  
719 (F) atovaquone inhibition at 1.125  $\mu$ M.

720 **Figure 2: Atovaquone inhibits ZIKV infectious virion production in mammalian cells.**

721 (A) Vero, (B) 293T, and (C) JEG3 cells were infected with ZIKV MR766 at an MOI of 0.1 in the  
722 presence of atovaquone (open symbols) or DMSO control (closed symbols). Virus containing  
723 supernatants were collected 36 hours post infection and infectious virus was quantified by plaque  
724 assay on Vero cells. The mean and SEM are shown, n=9, Students *t*-test, \* p<0.05.

725 **Figure 3: Atovaquone inhibits chikungunya virus replication.**

726 (A). Vero cells were pretreated with DMSO or atovaquone (ATQ) for two hours and subsequently  
727 infected with CHIKV (IOL) expressing ZsGreen at a MOI of 0.1. After infection, virus was removed,  
728 cells washed and media containing atovaquone was added for 24 hours. Cells were then fixed  
729 and ZsGreen positive cells were quantified by a CellInsight CX7 high-content microscope. Data  
730 are represented as percent ZsGreen positive compared to the DMSO control. (B). 293T and Vero  
731 cells were infected with CHIKV ZsGreen at a MOI of 0.1 in the presence of 4.5  $\mu$ M atovaquone.  
732 Unabsorbed virus was washed off and media was added containing DMSO or 4.5  $\mu$ M atovaquone.  
733 Infectious virus was quantified 24 hours post infection by plaque assay. The mean and SEM are  
734 shown, n=3, Students *t*-test. \*\*\* p<0.005.

735 **Figure 4: Atovaquone acts early during ZIKV infection and inhibits viral RNA synthesis.**

736 (A). 293T cells were infected with ZIKV MR766 at an MOI of 0.5 in the presence of 4.5  $\mu$ M  
737 atovaquone. After absorption, cells were washed extensively, and media was added without (at  
738 entry) or with (post entry) 4.5  $\mu$ M atovaquone. Infection virus was quantified by plaque assay 36  
739 hours post infection. The mean and SEM are shown, n=4, Students *t*-test, \*  $p < 0.05$ . (B). 293T  
740 cells were treated with 4.5  $\mu$ M atovaquone one hour prior, during, or post infection with ZIKV  
741 MR766 at a MOI of 1. After infection, virus was removed and media containing 4.5  $\mu$ M atovaquone  
742 was added for 36 hours. Infectious virus was quantified by plaque assay 36 hours post infection.  
743 The mean and SEM are shown, n=3, Students *t*-test, \*  $p < 0.05$ , \*\*  $p < 0.01$  (C). Vero cells were  
744 infected with ZIKV MR766 at a MOI of 1 in the presence of 4.5  $\mu$ M atovaquone. After infection,  
745 virus was removed, cells washed extensively, and media was added containing 4.5  $\mu$ M  
746 atovaquone. At time 0 (after infection), 24, and 48 hours post infection, media was removed, cells  
747 washed, and intracellular RNA extracted with Trizol. Viral RNA was quantified by SYBR Green  
748 compared to GAPDH. The mean and SEM are shown, n=3, Students *t*-test, \*\*\*\*  $p < 0.0001$ .

749 **Figure 5: Exogenous uridine rescues ZIKV virion production and RNA synthesis.**

750 (A) 293T, (B) JEG3, and (C) Vero cells were infected with ZIKV MR766 at a MOI of 0.1 in the  
751 presence of DMSO, atovaquone (293T and Vero = 4.5  $\mu$ M atovaquone and JEG3 = 18  $\mu$ M  
752 atovaquone), or atovaquone with 100  $\mu$ M of uridine (U), cytidine (C), adenosine (A), or guanosine  
753 (G). After infection virus was removed, cells washed, and media was added containing DMSO,  
754 atovaquone, or atovaquone with 100  $\mu$ M nucleoside. Infectious virus was quantified 36 hours post  
755 infection by plaque assay. The mean and SEM are shown, n=3, two-way ANOVA, \*  $p < 0.05$ , \*\*\*  
756  $p < 0.005$ , \*\*\*\*  $p < 0.0001$ . (D). Vero cells were infected with ZIKV MR766 at a MOI of 1 in the  
757 presence of DMSO, 4.5  $\mu$ M atovaquone, or 4.5  $\mu$ M atovaquone with 100  $\mu$ M uridine. Intracellular  
758 viral RNA was extracted with Trizol at 0, 24, and 48 hours post infection and viral RNA relative to

759 GAPDH was quantified by Sybr Green. The mean and SEM are shown, n=3, two-way ANOVA,  
760 \*\*\*\* p<0.0001.

761 **Figure 6: Atovaquone inhibits ZIKV infection and spread in an *ex vivo* human placental**  
762 **tissue model.** Human placental chorionic villus explants were infected with 10<sup>5</sup> PFU ZIKA  
763 (MR766) in the presence of increasing concentrations of atovaquone or a DMSO carrier control.  
764 Supernatants were collected at days 2, 4, and 6 post infection and viral titers were quantified by  
765 plaque assay. **(A)** Total virus accumulation over the course of infection. The mean and SEM are  
766 shown, n=3, two-way ANOVA, \*\*\* p<0.005. **(B)** Fluorescence *in situ* hybridization of ZIKV RNA  
767 (red) infected human tissues counterstained with DAPI at 6 days post infection.

768



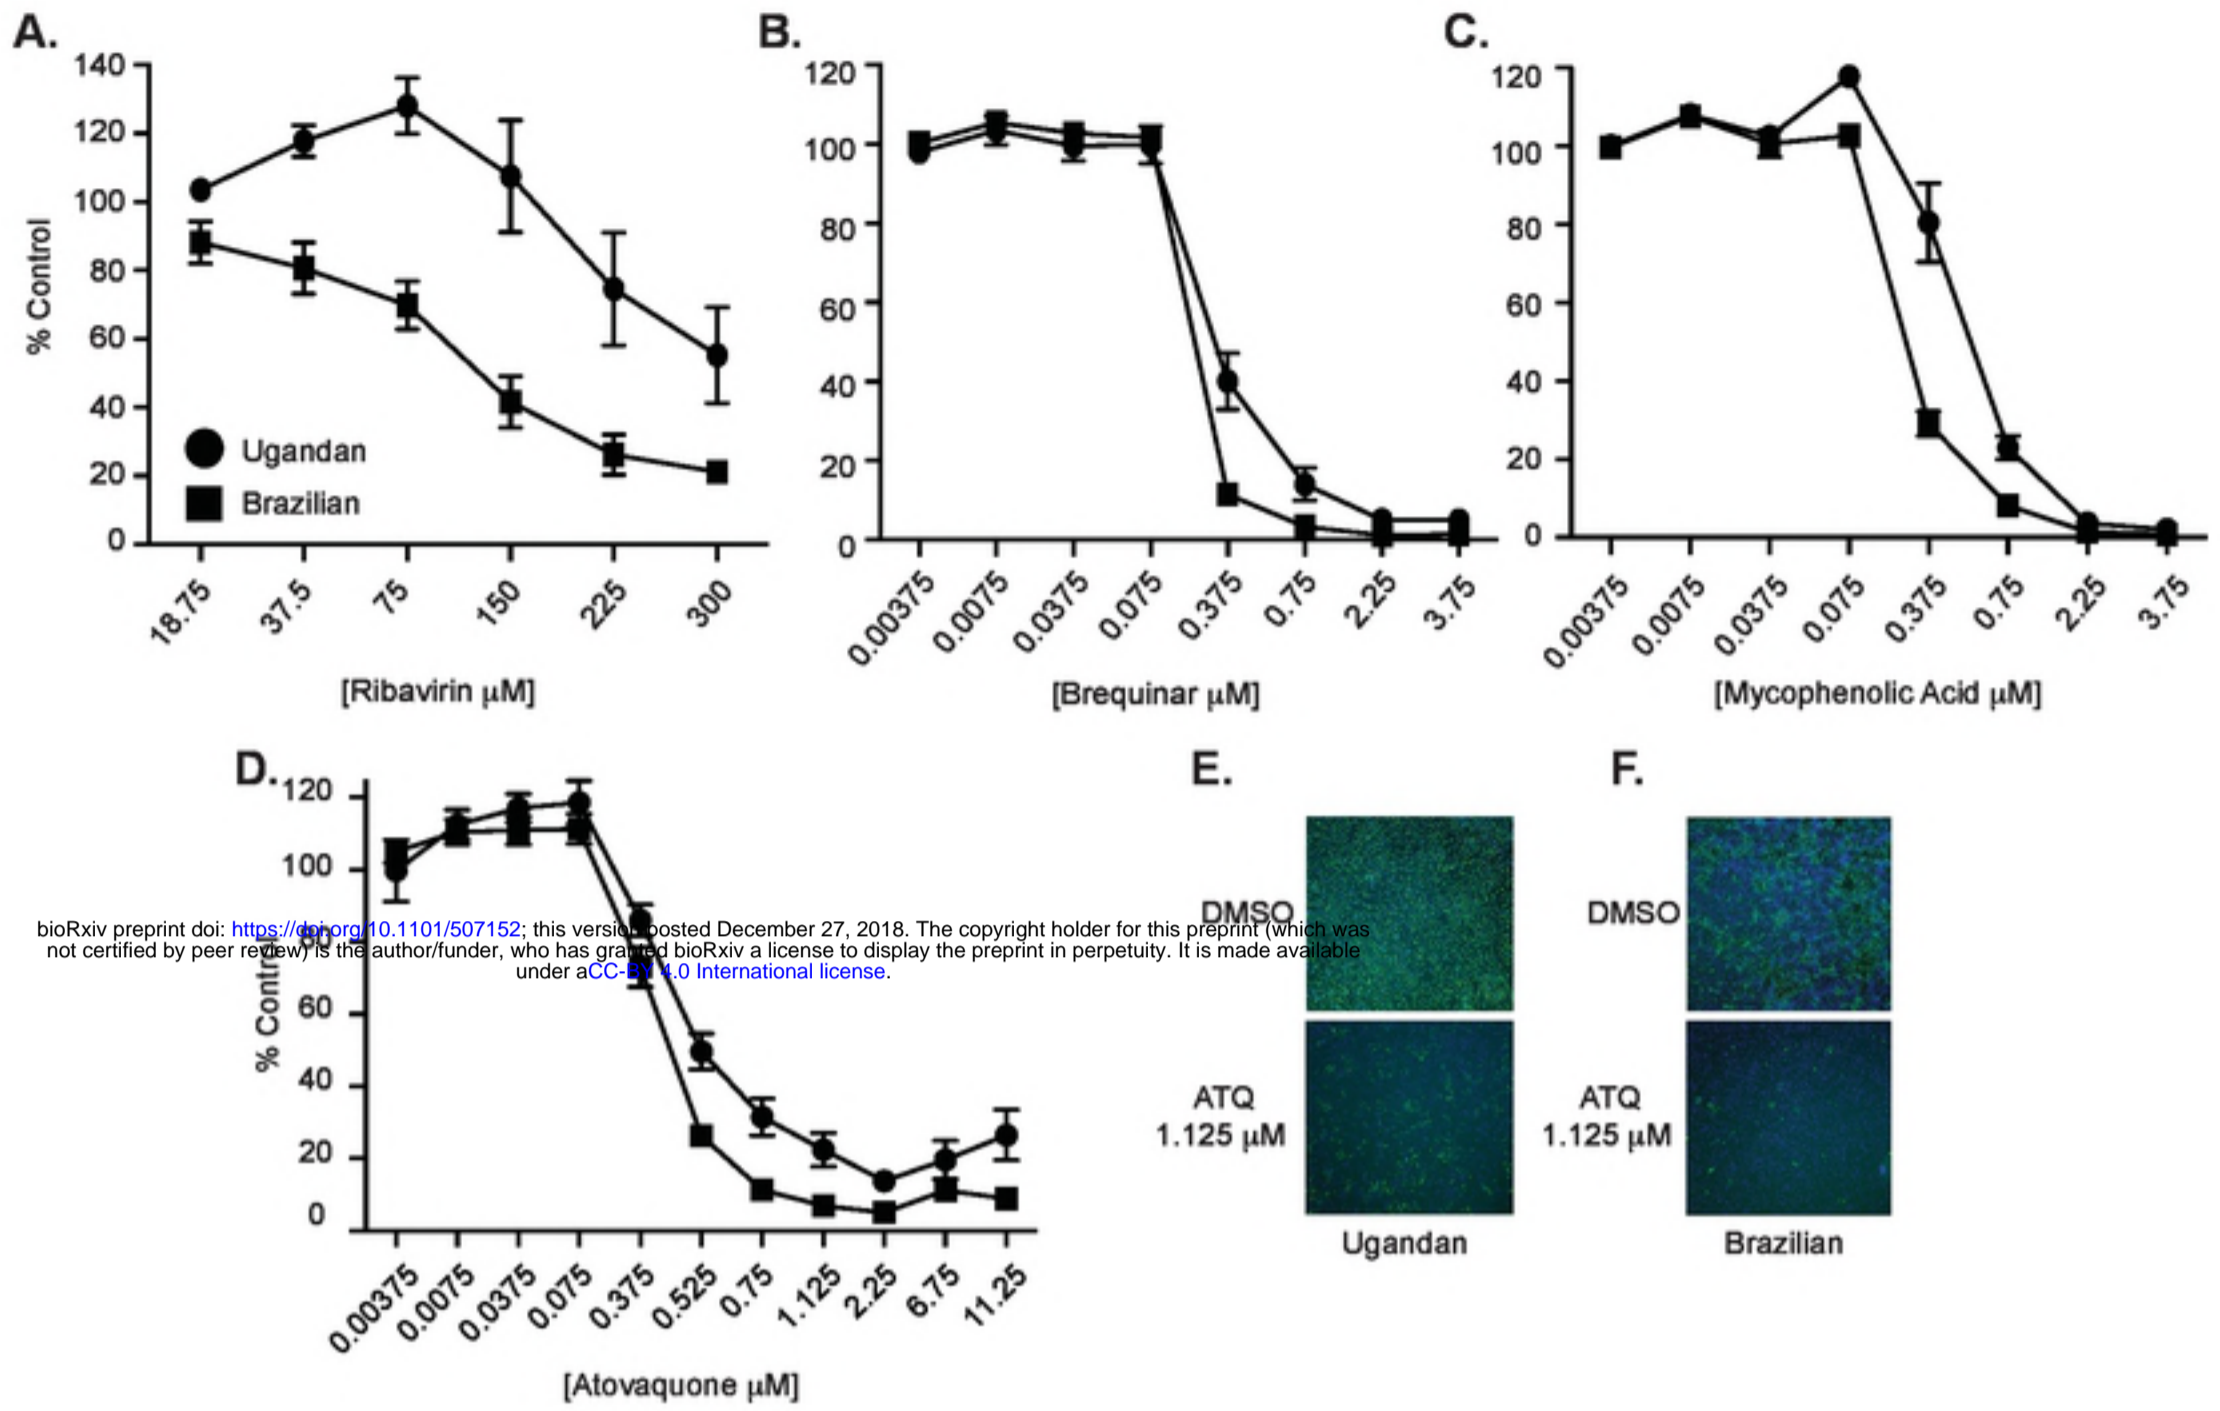

Figure 1 Kottkamp et al.
